# Supplementary material for: Characterization of Brucella abortus Mutant A19mut2, a Potential DIVA Vaccine Candidate with a Modification on Lipopolysaccharide
Source: MDPI journal article supplement (doi:10.3390/vaccines11071273), 2023-07-21
Supplement: s1 [file s1]

Supplementary:

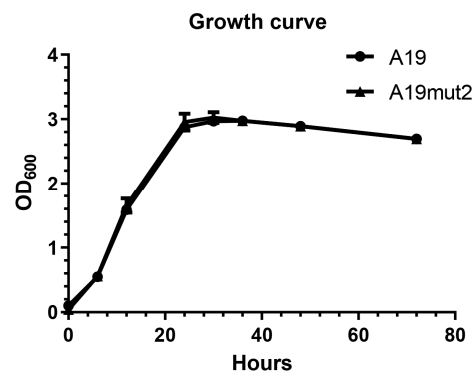

Figure S1. The growth curves of the A19 and A19mut2 strains.

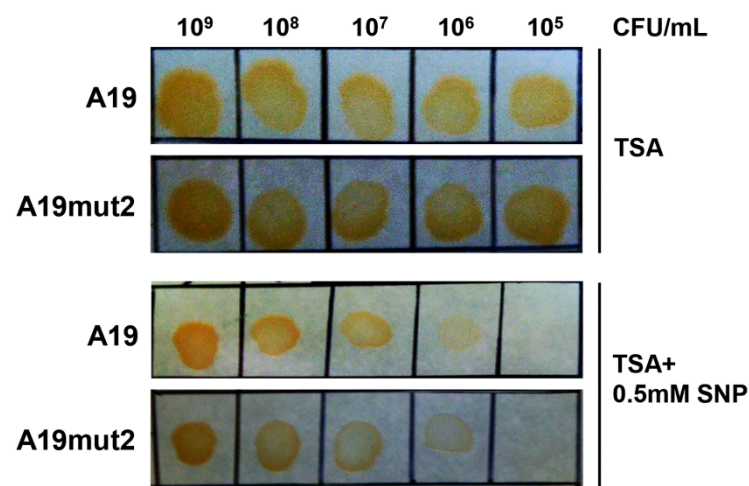

Figure S2. The resistance of the A19 and A19mut2 to sodium nitroprusside.
